# Supplementary material for: Reevaluating Near-Infrared Reflectance as a Tool for the Study of Plant Water Status in Holm Oak (Quercus ilex subsp. rotundifolia)
Source: MDPI journal article supplement (doi:10.3390/f14091825), 2023-09-07
Supplement: s1 [file s1]

**Table S1.** Models and equations used for fitting the individual data for the relationships between RWC and the different spectral reflectance bands (Figs. 3, 4 and 5).

| Reflectance Index    | Model                              | Equation                                                 |
|----------------------|------------------------------------|----------------------------------------------------------|
| $R_{1450}$           | Sigmoidal                          | $y = 0.0636 + \frac{0.2118}{(1 + (x/0.7973)^{6.9366})}$  |
| $R_{1599}$           | Sigmoidal                          | $y = 0.1977 + \frac{0.1995}{(1 + (x/0.8170)^{6.6457})}$  |
| $R_{1940}$           | Sigmoidal                          | $y = 0.0182 + \frac{0.0868}{(1 + (x/0.7905)^{9.7045})}$  |
| $R_{1450}/R_{820}$   | Linear                             | $y = 0.6150 - 0.4507 * x$                                |
| $R_{1599}/R_{820}$   | Linear                             | $y = 0.7023 - 0.2994 * x$                                |
| $R_{1940}/R_{820}$   | Linear                             | $y = 0.2786 - 0.2381 * x$                                |
| LWCI <sub>1450</sub> | Sigmoidal                          | $y = 0.5811 + \frac{0.6045}{(1 + (x/0.8767)^{-5.6351})}$ |
| LWCI <sub>1599</sub> | 2 <sup>nd</sup> -degree polynomial | $y = 0.6002 - 0.4522 * x + 0.8652 * x^2$                 |
| LWCI <sub>1940</sub> | Sigmoidal                          | $y = 0.7960 + \frac{0.2245}{(1 + (x/0.8115)^{-9.1485})}$ |
